# Supplementary material for: Genetic properties of the MAGIC maize population: a new platform for high definition QTL mapping in Zea mays
Source: PubMed Central journal article supplement (PMC4566846; doi:10.1186/s13059-015-0716-z), 2015-09-11
Supplement: 13059_2015_716_MOESM4_ESM.pdf [file 13059_2015_716_MOESM4_ESM.pdf]

Proportion of polymorphic markers per 1 Mb bin / normalized number of markers per 1 Mb bin

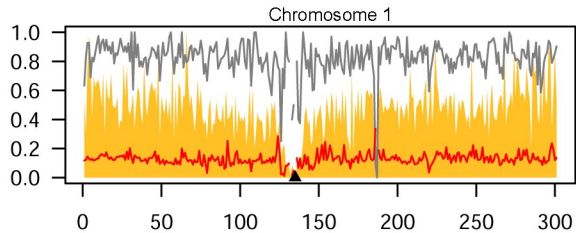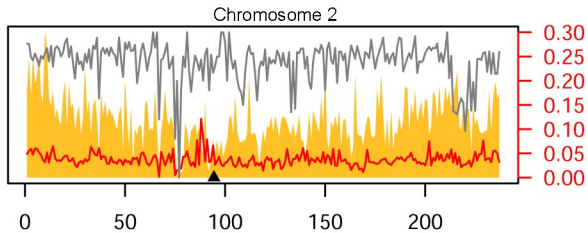

— Fraction of markers polymorphic  
— Mean heterozygosity  
Normalized number of markers  
▲ Centromere

Mean heterozygosity per 1 Mb bin

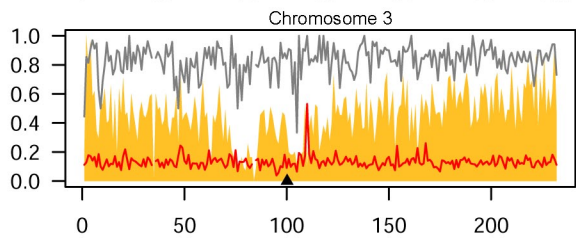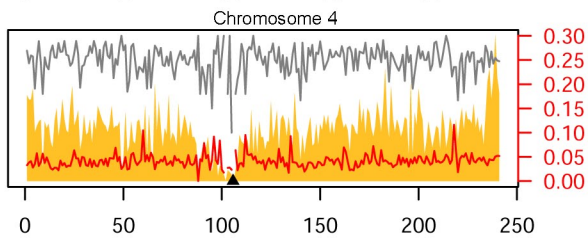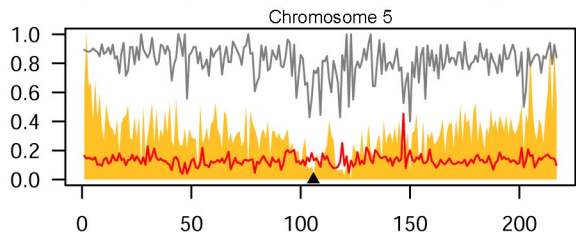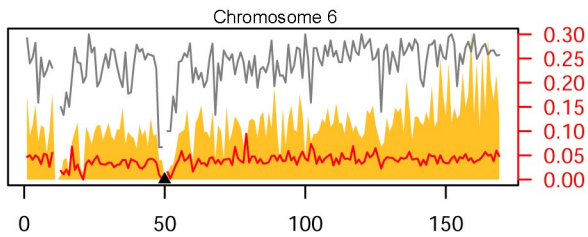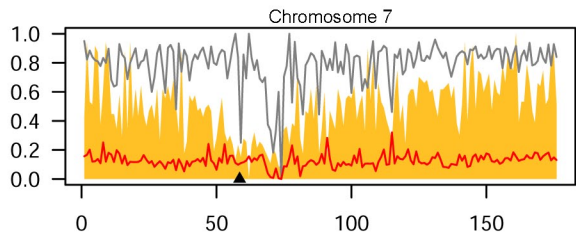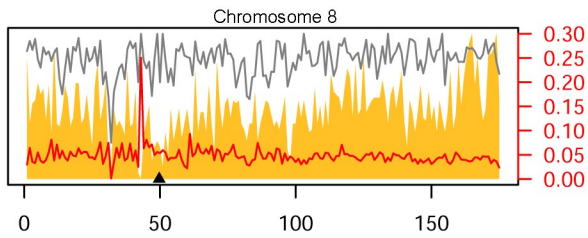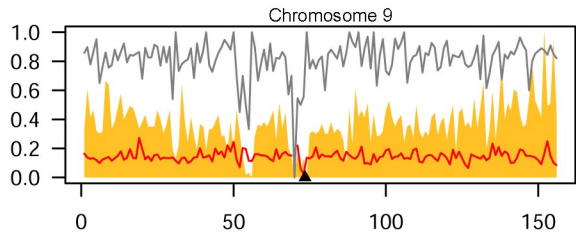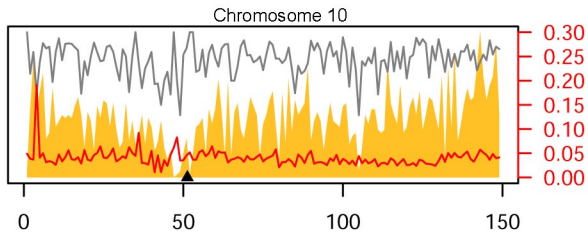

Genome Mb

Genome Mb
