# Supplementary material for: Genetic properties of the MAGIC maize population: a new platform for high definition QTL mapping in Zea mays
Source: PubMed Central journal article supplement (PMC4566846; doi:10.1186/s13059-015-0716-z), 2015-09-11

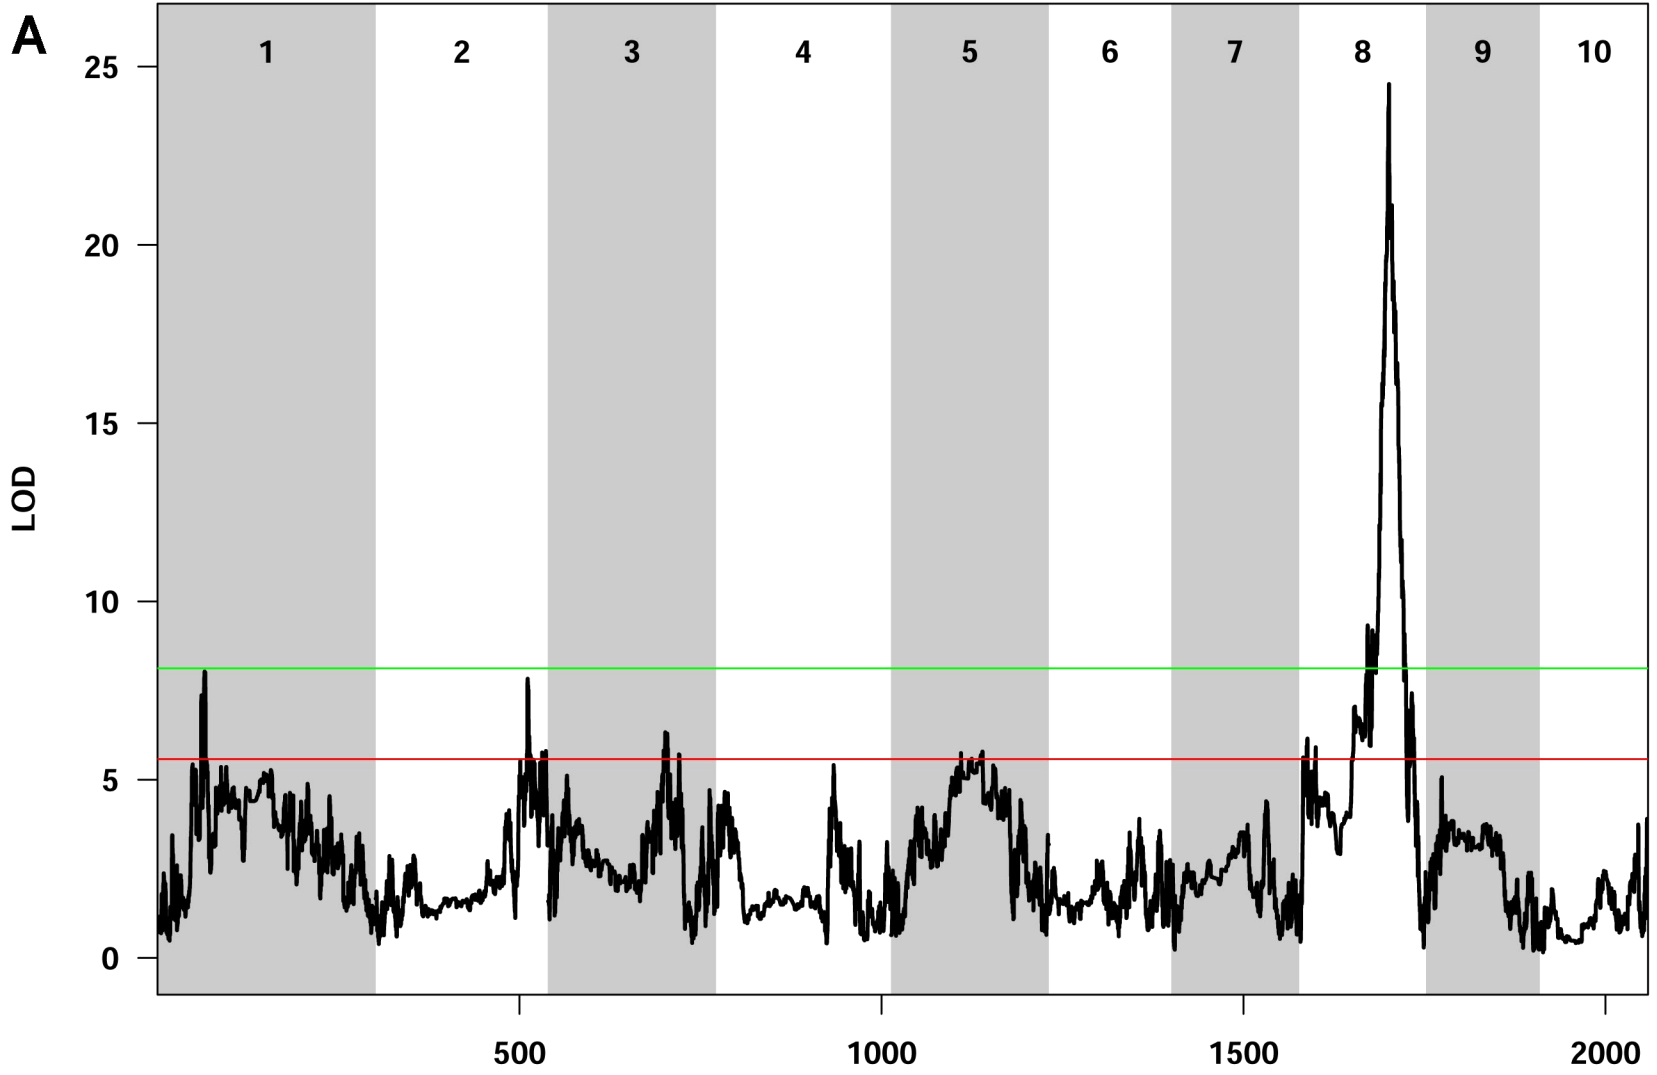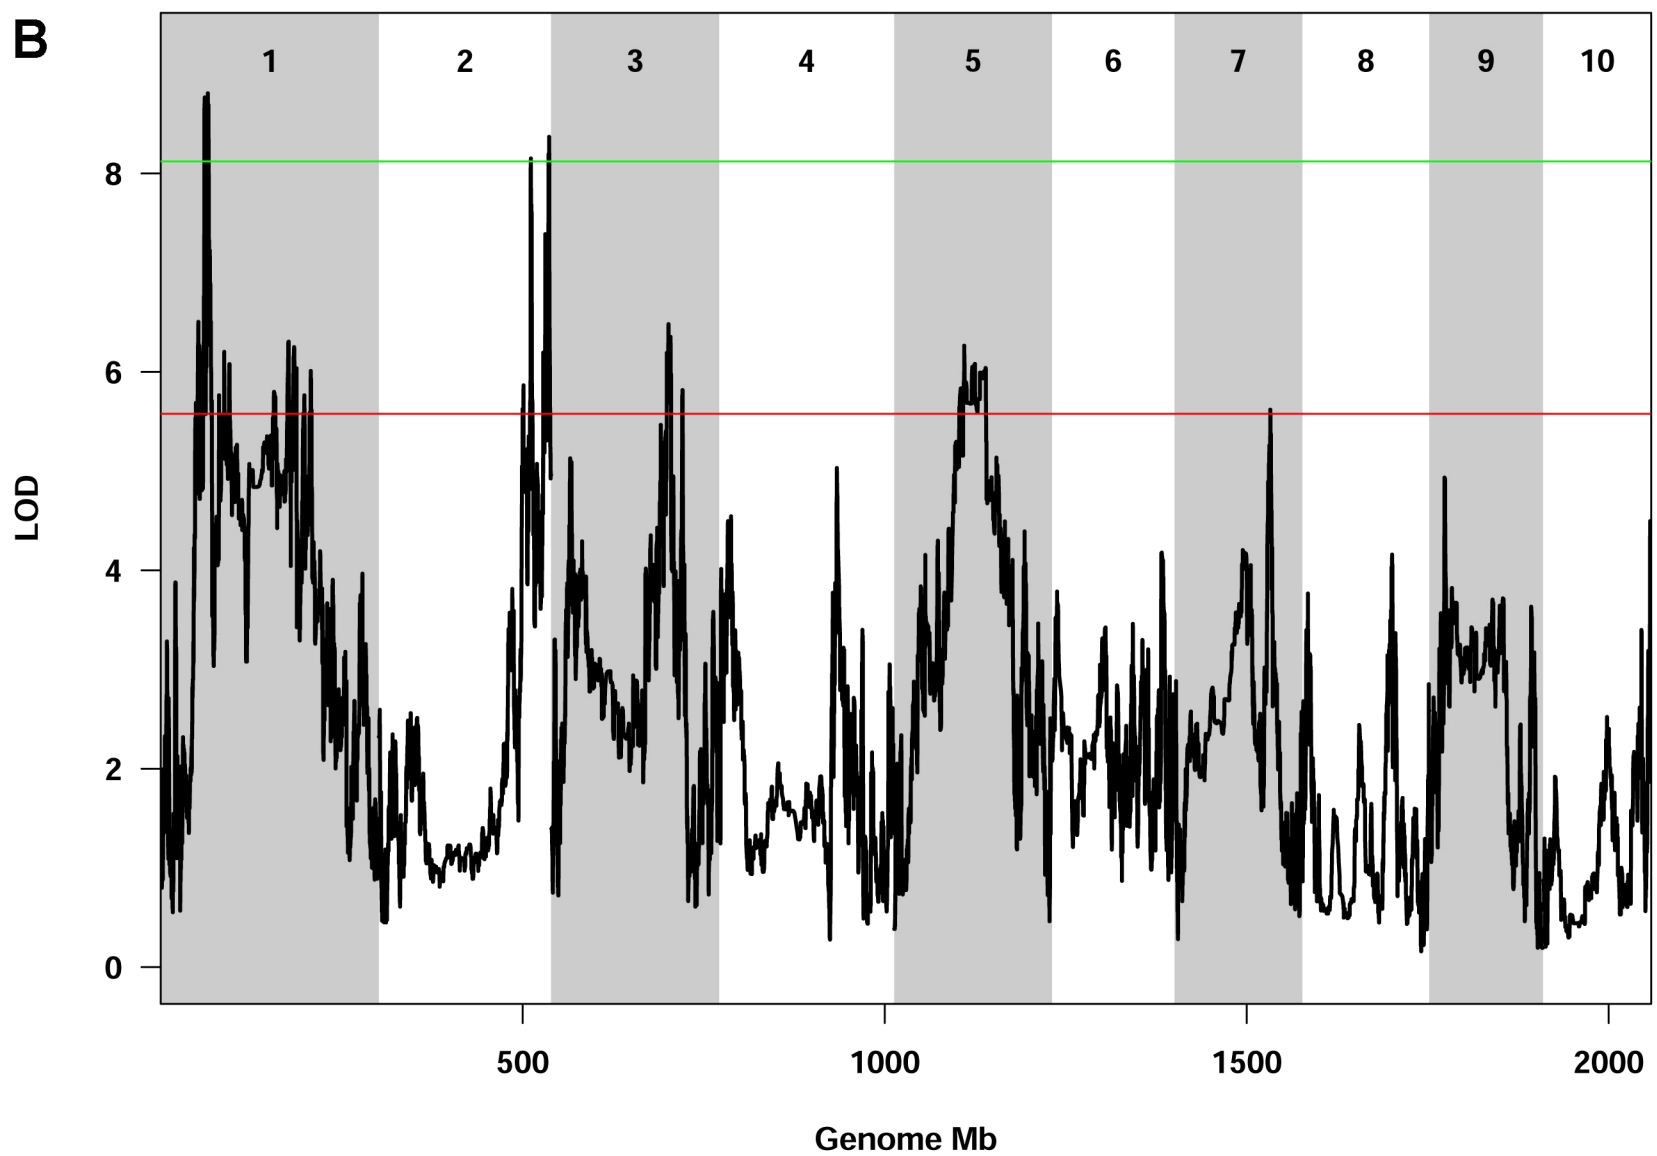

Supplement: 13059_2015_716_MOESM19_ESM.pdf [file 13059_2015_716_MOESM19_ESM.pdf]
